# Supplementary material for: Genome-Wide Analysis of the Amino Acid Auxin Permease (AAAP) Gene Family and Identification of an AAAP Gene Associated with the Growth and Reproduction of the Brown Planthopper, Nilaparvata lugens (Stål)
Source: MDPI journal article supplement (doi:10.3390/insects12080746), 2021-08-18
Supplement: s1 [file s1]

**Table S1.** The predicted protein sequence of AAAP transporters identified in *Nilaparvata lugens* and *Helicoverpa armigera*.

| Gene                                       | Amino acid sequences                                                                                                                                                                                                                                                                                                                                                                                                                                                                                                                                                                                                                                                                                                                                                                                                                                                                                                                                                                                             |
|--------------------------------------------|------------------------------------------------------------------------------------------------------------------------------------------------------------------------------------------------------------------------------------------------------------------------------------------------------------------------------------------------------------------------------------------------------------------------------------------------------------------------------------------------------------------------------------------------------------------------------------------------------------------------------------------------------------------------------------------------------------------------------------------------------------------------------------------------------------------------------------------------------------------------------------------------------------------------------------------------------------------------------------------------------------------|
| <i>NlAAAP01</i><br>( <i>Nlug16008-TA</i> ) | MEVSSEGKDNSSSCGTLPI SARSTDKLELGKLEKNGKTQD<br>KNIRTMQLATTDLDALLHVAKSSLGTGLLAMPFAFKHAG<br>VIEGLISTIIVGLICAHGTHLLVKTSQRM CQTLKKTSLGYA<br>DTVEAVFSSSRHTRLQSKASLVRKTVNMFLFTYYGAEM<br>SYVVFIAATLKEVTYHNLGYDMNIRLYMIMAIPPLLIIGTV<br>RSMKYLVPF SMLANMLLLSGVVFISYYVLQDLPLSSRPN<br>YIPITKFPIFFSTVICGLEGIGTVTYHNLGYDMNIRLYMIM<br>AIPPLLIIGTVRSMKYLVPF SMLANMLLLSGVVFISYYVLQ<br>DLPLSSRPNIYIPITKFPIFFSTVICGLEGIGTILPVENSMRN<br>PHHFLGCPGVLNIAMSIVVSLFTTVGFFGYWKYGD A VRD<br>TITLSLPEGYVASTVKLLVALAIMFTYGLQMSAVMEV VW<br>SAIEKKFESKNLDVAYYSTRASFVIVTVLSSIAVPQLGPILS<br>LVGAVGFSTLGLFIPA AVDTILLSHFSTNWLWVKNMG<br>MMALAVFALITGSYLSIETIIVDYS                                                                                                                                                                                                                                                                                                                                                                                    |
| <i>NlAAAP02</i><br>( <i>Nlug07328-TA</i> ) | MASTINMKNSGALDIRNTGSTESFNTSSQIELAPASTLDQ<br>DQKKKKEVLQSRDH SKATSDFGALLHVIKSSLGAGILASP<br>DAFKHGG LIFSIFGTIFMGIVSTHCTHLVVKASQDLCFML<br>KKPKLCYPETAEGAFQEGAGKRLRRYARLFRKMVDFSQF<br>ITYYGINTAYVLISSSAKEVVEYHFGVSYNIRWYSLASTL<br>LVVPIGCVKHKMYLVPF SAMANFLLGIGITISFYI FQDLP<br>PIDSRPAIQSPSSISLFLSTVLLGMEGIGTIMPIENSMRHP SH<br>FLGCPGVLNFAMLVVSLITLAESIKICVALAILFTYSLQLT<br>ASIEVLWDNVKHNFNKENQGKAYYVIRVLLIIGTVLLAIA<br>VPNLSPVISLIGAVGFAVLGITIPVIIDTILYWDEGFGMG NW<br>VLWKNGVLFLISLYAMIAGGITSKKISVTEKNGTNFSTSVN<br>VCDAKNAKQSGNGVFNEANTRTMHLATTDLDALLHVIK<br>SSLGTGLLAMPFAFKHAGIIEGLFATIFVGLLC SHGTHLLV<br>KVSQQMCTVLKKPSLT YSETVEAVFQTSPHGRLKAQSSL<br>VRKIVNAFLFLTYYGSNTAYIVIVAATLKEIAKDDLGYDY<br>NVRWYMLISTLPLLLIGTIRSMKYLVPF SMLANALLTGIV<br>FIFYYLQDLPPITSRNEFKPISNFPIFFSTVICGLEGIGTILPV<br>ENSMKKPQHFLGCPGVLNIAMTIVVSLFTSVGFFGYWKY<br>GDNVRDSITLNLPPGYIGSTVKLLVALAILFTFGLQMTAV<br>MEV VWFSAEKKFTPPNRDIAYYVIRGILVVITVLC A VAVP<br>QLGPVISLVGAVGFSTLGLFIPA AVDLICASDRGINWKSFS<br>VWKNLLMMALSIFALITGSFTSMRTIITQYT |
| <i>NlAAAP03</i><br>( <i>Nlug13074-TA</i> ) | TFTEIMDQNGLDNKGFEKGYENGMEKTPSILTLQNNDNN<br>FDTSSRLKLT KD SFPEKNGKKYPSKEESYDPFSNRDKSHA<br>TSSMGAFVHMKSSLGTGILAMP GAFKNGGLIFGVIGTLL<br>TGLICTHCVHMMVYCSQILSIRVKRPTLSFAETA EVSFQTG                                                                                                                                                                                                                                                                                                                                                                                                                                                                                                                                                                                                                                                                                                                                                                                                                                  |

|                                            |                                                                                                                                                                                                                                                                                                                                                                                                                                                                                                                                                                                                                                                                                                                                                                                                                                                                                                                                                                                                                                                           |
|--------------------------------------------|-----------------------------------------------------------------------------------------------------------------------------------------------------------------------------------------------------------------------------------------------------------------------------------------------------------------------------------------------------------------------------------------------------------------------------------------------------------------------------------------------------------------------------------------------------------------------------------------------------------------------------------------------------------------------------------------------------------------------------------------------------------------------------------------------------------------------------------------------------------------------------------------------------------------------------------------------------------------------------------------------------------------------------------------------------------|
|                                            | PPKYRFLASFAREMINVTLFCTYFFGNTVYIIFIARTFEQVI<br>EGHAHFGWDVRVYIVLLAFVLVPLGIIRTLKYLVPFSAIAT<br>AFISFGLALTLYYTFSEMPSDVSNRDFIGTPLKIPLFFSTVL<br>FAMEGIGTVLPIENSMNKPQQFLGCPGVNLGAMSIVVILY<br>VVVGFFGYLRFGNATQATVTLNLPDSALAESVKILVALSV<br>LLTYGLQFTVPSEIVWKRLGPRVSEDKQDMGYIIMRGSM<br>IIGTVIVAIMLPSLAPIISLVGAICFSILGLFCPAVIEIITFWEE<br>GYGKYQWKFYKNVFLIFLSIFSLVSGSYASILEILDAIKHG<br>EL                                                                                                                                                                                                                                                                                                                                                                                                                                                                                                                                                                                                                                                                              |
| <i>NIAAAP04</i><br>( <i>Nlug04460-TA</i> ) | MGTNGHVMTLANSIIGVSVLAMPFCFKQCGIMLSILVLL<br>MSGVMTRLACHYLLKSAINARRRNFEILAFHTFGPTGKLI<br>VELSIIGFMLGTCIAYFVVMGDLGPAIIGPVFNIDSTPSLRP<br>SVLMGLGLLVVLPLGLLKNVDSLSTICTATIAFYLCVLK<br>VMAEATTHLLSWDWVDKVNLRPAGISQCIPIFAMALSC<br>QTQLFEVFDSVPNTPLDKMNAVVRSAVNMCTAVYISVGF<br>FGYIAYCTQNFSGNLLMSFSPTVMSEIVKLGFVLSVAVSFP<br>LVIFPCRASLHSLFRRHGHTPHHELLSGGGNYIPELRFKC<br>LTVCIVLVSLGTGLLIPSIEVVLGLVGSTIGIVICIIFPALTFC<br>LSNKKNNERLLAQMLIGIGLFIMVLGTYSNLFATEEAITKP<br>DVDKQGTSIDLNQAGSPQLPEEAAAIKEKSEGVAVAGIPE<br>IKQQANDVLLQIKKVIDAEDSDKRKEPPVPVAPGDNIVKD<br>SNVNSPISSAVKQMKEEMEKENEDMKPTEKGEGIQKETNI<br>LKEPIKNDVLIKEDQLKKLYKIEVNSPIKSETLEKSPNAE<br>VKEIKKPKRHKEDVLKIMAKVGNSDRDQEKNVPPYENN<br>KNNIDKEDEISNPKVNNIIKLDDTAKQNDEKSIKLSDTLK<br>VPRQEIELKTASDSDLGNKKLGDNQEKNGV DITPDLEKNI<br>IKGVPLPIAVRNNMNKNSVELDKPFLDIEADKQKIGGVRD<br>ILSEKEKFVKEEREKRDLETVEKEDMNNFEKDVVPEKPE<br>VESTIDKQNVIEKEKSNSIKGEVEKPVEHKDVVPSSGSHL<br>GTV DSEAKCSKDSKNQFKEDENGLQASILKMELKKIPQE<br>SEKDMEMPVTDKQVLQTSVEPLIKTPKFMSPPETVLNAV<br>ELKPEELIRTAQDVKPM SRDLKSVNNDQGNTKNTRQQDR<br>ITEIT |
| <i>NIAAAP05</i><br>( <i>Nlug00688-TA</i> ) | MTEPPKPDEKSYILNAHKAVLEQQSSGESPEGRSGTHQDT<br>EQLFVDKKERTTGLGFASFNYINSILGSGVIGIPFALHQAG<br>FGFGFLLLGFMALVTDYSLILMVRS AHISGSFSYQGLMEA<br>AYGQPGFYLLTFLQFTYPIAMVSYNVVVGDTVTKVLIRI<br>FDLRPWSLLARRDFVLLATVFVTVPLCLLKDMARLAKA<br>SLLSLFFVVFILVAIVVRLFTFSSVPTTSNAWQLYNWGV<br>PAIGIMAFAFMCHHNVFLLYGSIEQADQKSWETVTHYSVF<br>ASFIVACLFGLTGYATFTGFVQGDLENYCRDDDLNMMA<br>RVAFSASILLTYPIECMVTRAVVDQVVNITNATMRHYGVT<br>LIISV TYFLSVTTDCLALVLELNGVMSAVPLAFILPAASYL<br>KLEEGSVLSRKKL PALGLALFGTVVAVMGAFMIFRHFSSV                                                                                                                                                                                                                                                                                                                                                                                                                                                                                                                                                           |

|                                            |                                                                                                                                                                                                                                                                                                                                                                                                                                                                                                                                                                                     |
|--------------------------------------------|-------------------------------------------------------------------------------------------------------------------------------------------------------------------------------------------------------------------------------------------------------------------------------------------------------------------------------------------------------------------------------------------------------------------------------------------------------------------------------------------------------------------------------------------------------------------------------------|
|                                            | ERCAHGRVMEYCLPSFANKTHSF                                                                                                                                                                                                                                                                                                                                                                                                                                                                                                                                                             |
| <i>NIAAAP06</i><br>( <i>Nlug19955-TA</i> ) | VPPLAAQLDNSDSNVAIPGPEVSDPTPPVGGKASKAVGT<br>PNSDYNPLNNRDLEHPTSNLDTMIHLLKGNI GTGILAMPD<br>AFRNAGLVVGT VGTLLMGIIC THCMHMLVSCSHEL CIRH<br>QIPALGFAEVADHAFRSGPNRLRN LASYARKIVNTFLVITQ<br>LGFCCVYFVFVAANLHEVIKHYYMSISVPWLLLILLIPMIL<br>LNWVKNLKYLT PVS LVAALLTGTGIVISFMYMLQGLPRTS<br>SVNAFASWHQLPLYFGTAIYAFEGIGVVLPLENNMKTPQD<br>FGGLAGVLNTSMVIVACLYTAVGFFGYLKYGDRAVLGSIT<br>LYLPQRDLLAQLVRLMMALAIFLSYCLQFYVPM SIIWPPI<br>KRRINDESYQKVAELSLRTFLVCLTFLLAVAVPNLSAVISLV<br>GAVSSSMLALIFPPIIEMVTFWDKGLSPALI IKDIFILLFGIF<br>GFIFGT YVSMYNI VTK                                                |
| <i>NIAAAP07</i><br>( <i>Nlug15355-TA</i> ) | MYQII GLNLGTGNVKCAHEL Y YRTRVT SMSFADVGEIAFA<br>NGPPWARRFSGLARVSIIVGLFAAYFATCSVYTVIIATNFQ<br>QVIEFYTG DDEATSGERIRLYIAALMIPLVLISWVPNLKKL<br>APISMVANAFMGVGLLITFY YLSIDLPSVAERAYVAPFEA<br>MPQFFSITIFAMEAIGVVMPL ENAMKTPQHFIGICGVLNQ<br>GMGGVTMIYIFLGLGYLKYGAETKGSITLNLPIEDYAAQ<br>AVKILVGLAVFCTYGLQYFVCLEIVWNSLKD RFQKNSAL<br>AEYVVRTILTVAAVLLAVAVPTIGPFLGLIGALCFSLGLIIP<br>VFIEFVTYWEKGFGPGNWIVWKNILVLICGFLALVFGSYT<br>SLLEIINVKDLPSPLETFTNESSLLGNETMTHLNATLQQLG<br>E VVNSTLEAAVDKLT                                                                                                 |
| <i>NIAAAP08</i><br>( <i>Nlug12813-TA</i> ) | MTASSPKELQQNRSLEKDAELEKGKGGGHGLPPNKHPTS<br>FIETLVHLLKGFVGS GFALGEGFKNVGLILGT VLT VFIGI<br>ACVYCEHILLKCSTTLKRRKLSYYPDFAETVEMCFEEGP<br>QSLRKFAKFTGSITYFMIIFMQFGFC CVYILFISNTSKYISD<br>SYGLNLDLRVHMCIMMVPLILSSLVRSLKYIVPISLTANLC<br>MIFGIASTMYIVMQDLPPVSSRRYIGDLGNVPLFFGTAVYS<br>FEGIGLVLP LKREMKNPKHFD RPLGVLNLGLVIIVSIFLMM<br>GFFSYLKYGDDIQASVTLNLPEKLAITDGESGNRNWNIVH<br>ICTHVLCANRTDLAEDRSQVR SSEQATPLRTHISNIHG FCH<br>KLSQMVRVAIGIGILFTYALMFYVPIELIWPRIAARFGPLSK<br>PLLSELIFRIFMV FVTIFIAECIPHLGLFISLIGAFCSAFLSLV<br>VPTVCDLILRWPSTFGTMKWRLALDIIALFLSVIGVTSGT<br>YYSLEAIVLAFIGESS |
| <i>NIAAAP09</i><br>( <i>Nlug01999-TA</i> ) | MVKENTLNCQNLKLQLRYVPVALGGSSASTCDKQQLSN<br>NREFKRKVIALSRPPGTPVTPKSPHPTDCLPQCRDANPGIS<br>LFEKIWKTP IARIGY EYYACIPMRLTRRPKSGGGWGGDRQ<br>LKQCGSDHCDGW HGNAKANALHTPQYKQPPLQYYETFR<br>KIECTNNLIQLYVFRFTVWNTMVGTSLLAMPWGMWESG<br>PLLGTLLCLVMASVCLYTAYLNVSIYSKNGKPGEGAELFV<br>LIKDLIGPWAEIIAKLFSVLVLAGAAIIYWILLSNFFYHNVY                                                                                                                                                                                                                                                                    |

|                                            |                                                                                                                                                                                                                                                                                                                                                                                                                                                                                                                                                                                                      |
|--------------------------------------------|------------------------------------------------------------------------------------------------------------------------------------------------------------------------------------------------------------------------------------------------------------------------------------------------------------------------------------------------------------------------------------------------------------------------------------------------------------------------------------------------------------------------------------------------------------------------------------------------------|
|                                            | FIFYYLNRNDSNMQPTWSTTVLCPNHENFTSAESRAEEAH<br>DTFNSIWNLHRTVPLYLILILFPVLNFKSPTFFTKFTSLGTM<br>AVMYIMFFALVKFFVFGVNVSHDPESEYYTSFAHWTTFP<br>KMSGMLTSLFIHNIINLMKCNEKQENNKRDLSIAYILVC<br>TTYAFVGLVIYVSFPAAKSCIQDNILNNFLTGFDMTLFARF<br>FLFFQLITVYPLILFMLRNQVLTMIQSNYPSVSSVVGfNA<br>VIVSLCVFFAIVFPQIGHIIRFTGAIAGFIHVYSMPCLLKIMS<br>EKADGSLTTTSMIIHVAIPILGFINIIAQFIV                                                                                                                                                                                                                                             |
| <i>NIAAAP10</i><br>( <i>Nlug07975-TA</i> ) | MSKGDSIGLQKVNGNKGSNYSVESGSPGPPYDPHAHREL<br>ANPTTDRETLIHILKGS LGTGILAMPNAFYNSGLIVGT VAT<br>FVIGFICTYCLHVLYYFCFRPIVDGFLIYQLGICVCYIMFV<br>AQSIKQVADIYATPLDVRLHMLIILVPLMLITYIRNLKLLAP<br>FSQLANIITFIGIGITLYYIFDDLPPVNSVPYVGVLRNFVLY<br>MGTTLFALEAVGVILALENNMKTPKSFGGYTGVLNQGMI<br>VIVILYVLVGFFGYVKY GKGALGSVTLNLPSTDILAQVVK<br>LIFAVAFITYALQCYVPVDIVWNTYMKKNISTKHLFW EY<br>VLRTAAVLITFVLAVAVPRLELFISXFGAFCLSALGIAFP AI<br>EICVMWPDNLGTGYIYILFRNFLILFGIAGLLVGTYTSISDI<br>ITSFSK                                                                                                                           |
| <i>NIAAAP11</i><br>( <i>Nlug10573-TA</i> ) | MSCQPSLLNITNESFKNELNKS AVADPGLNLNIFVIGSDIK<br>DGNRSTLKLVEKSKEELNEEEYDPFSFRQVQHPTTYGETL<br>VNFLKSLVGTGVLAMPYGFQNTGMIIGILGT CIIGFISAYC<br>GNTLVRCSHILLKRRKIPILDFAGVAEQ AFLSGPQRFRKYS<br>MFVGKFIDLFIVLGTIGGNGCYIVFIASNLKQLLDPMVGE<br>HSSRIYMVAMLPVILVMNLVRNLKYIAPFSMFANAVLGSG<br>LVIIFFYYIVQDLPAVSTMPLYASASQLPLFFGTAVFAYGMIG<br>VVLPLENDMKKPTQFLGVGGVLSIGVCFTAVLYTTMGFL<br>GYLKYGEKTEASITLNLPLDEPIAKSVKLLYSVAVLFTYP<br>MASYPAMQILQSYS AKSFKSLSVLYFFRVLMDVLTVLLAI<br>LIPNLGAFVSLVGAVSSCLFGLIFPPVIELLTY YEDFN YGRF<br>YSRIWKNIFIIFGALGFITGTYFSILDIINFDK                                                   |
| <i>NIAAAP12</i><br>( <i>Nlug01820-TA</i> ) | MALGPHKTTEPATKMTRDTLSIALHNSGKNDKSEKNGLD<br>NPALVMGSKTSINPPEMYSAPPYSEKGMSKDVLQSVYVV<br>PANGTKTEKEEEYDPYLN RNVKHPTTYWETLIH MWKAS<br>LGTGILAMPNAFH NAGFAVGTIGTLVIGFLCSYCIHILISTQ<br>YELCRRRKTPSMTYPATAEAAAFQDGPTWTRRIAPYAPGIC<br>NAFLLAYQLGSCCIYVVFVASNIKSV MDDYIEPMDVRVY<br>MVILLVPLILINWVRNLKY LAPFSSLANILT VISFAITAFYV<br>FQDLPDLSTRAAVGSFKGMPLFFGT VLFAMEAIGVVMDD<br>YIEPMDVRVY MVILLVPLILINWVRNLKY LAPFSSLANILT<br>VISFAITAFYVFQDLPDLSTRAAVGSFKGMPLFFGT VLFAM<br>EAIGVVMPL ENEMDNPKRFGSAFGVLNCAML PITILYTIV<br>GFFGYLKYGENAAGSITLNLPGDQLLAQSVKLM LALSIFV<br>THALACYVAFDITWNQYMGPRVESKKMFWEFFCRTMLV |

|                                            |                                                                                                                                                                                                                                                                                                                                                                                                                                                                                                                                                                            |
|--------------------------------------------|----------------------------------------------------------------------------------------------------------------------------------------------------------------------------------------------------------------------------------------------------------------------------------------------------------------------------------------------------------------------------------------------------------------------------------------------------------------------------------------------------------------------------------------------------------------------------|
|                                            | VVTFGFAVAIPNLELFISLIGALCLSTMGLSLPAVINMLTFW<br>DQYRGVGFILFISKNMCIILISVLGFAVGTSTSLHEIIEKFFH                                                                                                                                                                                                                                                                                                                                                                                                                                                                                  |
| <i>NIAAAP13</i><br>( <i>Nlug01818-TA</i> ) | MVQKISSDGAPLHKSTTISVAVSGRNGHPMISEYDQKKGS<br>SRTELADLVIVKYKCESNGVPMKLTNGSTLPLVPGSSKEA<br>EEGEGYNPFAHRVLEHPTTDLETLIHLLKGS LGTGILAMP<br>LAFANAGLLFGLIATFLIGFLCTYCIHVLVNCAHILLKRMK<br>IPSLGFADVAEVAFLAGPQSTRKFAGFARGMINSFLVLDLL<br>GCCCCVYIVFVAENLKQVVDTKAGVDWDLRFYMILILPFL<br>LLVNLVRNLKY LAPFSMVANIFIGVGMGITFYIYIFDDLPPV<br>SSQPQFSSWHQLPLFFGTIFALEGIGVVMPLNNMKTPA<br>HFIGCPSVLNIGMFLVILLYTGVGFFGYLKYGADTAPSITL<br>NLPRHLALAQS VKTMIAVAIFLTALQFYVPMEIWKNTK<br>HRFTSHPIAAEYAIRISLVCLTSKYIRYSSFASDIM                                                                           |
| <i>NIAAAP14</i><br>( <i>Nlug01815-TA</i> ) | MTTKSDRVSYHDDNKTDTPAVPEKIPLLLPTIKQAGIGDIE<br>TLVHLLKSSLGTGILAMPMAFKNAGLIFGLLGNIFHRIHL<br>HLLCPHVKCAQILCERKTIQKIGFQKVVELSFLEGP KATT<br>KFSTAAGKTVMAALLMELLGCCAYVVFVAKSMKQLVD<br>HYGGHEMDVRFYMLLLVPCLITTNMGKSLRFITPISVISNS<br>LFMGGVGVSYYYIFDDLPSVRERPWAVSWHHWPKFFGT<br>AIFAMEGIGTIMPIENSMKTPKHFIGCPGVNLNIGMIILVTLY<br>SITGFFGFLKYGAATDDSITFNLPTGAPLAQVLKIVIALGIF<br>LSYSLFFASIDLLRDNLQRYAENSIRIWLIVLTVVIAALF<br>PNLGPFLT LVGALSLSIVGLIFPPICEVLVYWHSPGLGRFN<br>WRLWKNILIVCFGIVGLITGTMTSISEFARAYRR                                                                            |
| <i>NIAAAP15</i><br>( <i>Nlug01817-TA</i> ) | MEISEGEKGRDYFGESGLEKVCMLEYSDVIDPPELIPKPM<br>KDIWRNGISAIACSGQEKKAAIAKNVISQKDQEAAFYD<br>PFMNRNVAHPTSDFETFVHLLKGS LGTGMLAMPMAFKN<br>SGLFVGLVGSIVVGYVCTYCVHMFVRASHVLCHRHQLPA<br>IGFQKIVELSFLEGPECLKKFSKAAGYVINFGLLTELLGVC<br>SAYVLFVAKSMKQIVEHYWHVDM SVQVYMAIMLPVLITI<br>NLTRNLRHLTPLSMISNVLFLLGVFVSFYIYIFEDLPPISSRP<br>ASFSSWGQLPLFFGTIFALEGIGVVMPLNNMKNP KHFI<br>SCPGVLHIGMVFLIILYAITGFFGYLKYGDKVEASITLNL P<br>VETMLGQFLKTIVAI AVFLTYFLLFYAAMDLLGIVNGRRF<br>KTRPLLKENIVRILT VIGTVV VAGLFPNLGPFLSLIGAFSLC<br>VVGLIFPPIIDTLIYYREGLGRLKWRLWKNGVILACGV LG<br>LVTGTMISLQEFVESMGGA |
| <i>NIAAAP16</i><br>( <i>Nlug01797-TA</i> ) | MADSGYEPGDHRQHLKHPTNYMETLIHFYKACIGTGIMA<br>MPYAFKEVGWASGLAITIVIGSLCVYMTNRLAISSRMCI<br>LEQKPTMSYVNTANACLKYGP ELTKNFKYFGSTANMFLI<br>LYQFGCSCIYVVFVSGNLKHVWDYCYPETNPDIRLFMLIV<br>MIPQCIVGLVDNYKHL SYFSLADICTISGFVLMFACYLLV<br>DTKSLSEISPSNNGVYRFPMFVATVFFSMEAVAILALENE<br>MKTPKH YTG YFGIVNMAMIPAVVLYTAFGFCGYLKYGED                                                                                                                                                                                                                                                           |

|                                            |                                                                                                                                                                                                                                                                                                                                                                                                                                                                                                                                                                                |
|--------------------------------------------|--------------------------------------------------------------------------------------------------------------------------------------------------------------------------------------------------------------------------------------------------------------------------------------------------------------------------------------------------------------------------------------------------------------------------------------------------------------------------------------------------------------------------------------------------------------------------------|
|                                            | VKSSATFNLPGVDRIAQVILFSMSFAIFVTYHLSVFVTYDL<br>IWKTYLGGPDESKNTETHVEINFFRHYMIRLAILGTNLCA<br>MGIPNLSLFIVLLGALTLSVTGFIVMMWVCIYWNQYSG<br>VKFAIFIAYNAFLFLAGCVAVFGLGQAIYDIAIFYDGEETF<br>D                                                                                                                                                                                                                                                                                                                                                                                              |
| <i>NIAAAP17</i><br>( <i>Nlug07143-TA</i> ) | MERDEIKVNLNGDSYSTEKCMITHQSELPLLMSSSENDGK<br>LQKEEGDDLHPGVKHPTSYVETLINLIKNTGAGMFAM<br>GDAFKNAGLLVGPILTVILGIICVYGNHILVNCSVAIREKK<br>KMKKPLAFAETVQICFEEGPKFARPWANTVRICTYVFITIT<br>QLGFCSVYFVFISSTLVKILVPYGINIAAHTYMTMILLPILA<br>TALIRNLKFLTPISLANLSLGSGLVLLTLFFASRDLPLATR<br>RMAADWKQLPLFFGTTVYAFEGISLVPLQNEMKNAKKF<br>DTKFGVLNMGMTVVCAILISIGFVGYLKYGDDVKGSRTL<br>NLEGTGLFSEIVQLNICFGILLSYTLQFYVPIKIIWPHVERK<br>FAPMKHPVLCEKLFRTAFVIGTYFVALTVPHLGHFISLIGA<br>VCGTTLALIFPPICDLVIRWPSDFGKLKWRLILDIFSLLVAA<br>IGLVTGVYYSLEAIFDAYSNTT                                                 |
| <i>NIAAAP18</i><br>( <i>Nlug10388-TA</i> ) | MPDEKLSVNSSMGRSVNYQSTSSSREPIWTRVANDPLSGS<br>CSGYESNESYDRSLTSCTSSEPCKGKGLNVFNAAVFVAGE<br>MAGSGILALPKAVVDCGWIGLVLVVVFCLNACYGGCRL<br>GKCWTILEERYPEHRASSRNPYSTIAYRAYGRWCSLLVSG<br>CIQVTLFGAGVVYLLAAQIFQELLRTIVPEIGYCMWFLIF<br>AVLTIPVMWLGSPPKDFSFAGIGALLTTILSCFLIIAQIATEGL<br>ELKHPPQHAPHTFKEFFLAFGVILFAYGGASTFTPTIQNDMT<br>HREKFPKSVAIGFAVIFLLYLPVSFGGYFVYGDVNSNILL<br>SLQRGPFELVANILMAMHLLLAFFIVVNPVSQEIEEIFDIPH<br>SFCWKRCIIRTLMVVAMIVVGETIPKFGMILALVGGSTITL<br>TTFVLPSLLYMKLCDQKSVDWPDRIPLYERVYMWELIVI<br>GLLGGAASTYSAMTAIFSADALTKPCYWPDVK                                     |
| <i>NIAAAP19</i><br>( <i>Nlug10180-TA</i> ) | MEETYSLWTGLIYVFNLIIVGTGALTLPAAVLKAGWIVGIA<br>MLCFLAIVSYITLTFVVEAMATANAITQWYKMKRLKRVS<br>QNLCMVINQGIGDDDDDDHDNVDDDDDDVERINDNDEN<br>DSMLSSDAPLYSAGTLRNFPMPVTFFSIDEK VEMGQM<br>ARLFFPKVGQFLFYLTFCLYLFGDLSIYSA AISKSLVDVVC<br>EADRNSSLLKDNEPCFENYNITQKTAYRLFLSAFLVVFGP<br>FVFFNVQKTKYLQILTSLTRWLAFTSMIALAIRRLSPSLP<br>HGDPTPAHLHGVP TLFGACIYSFMCHHSLPGLLAPIHATS<br>KRRLLPGLAADYLLILLFYLT LVLTGIFAFPDLQPLYTLNFT<br>PRPGDSGYLRAVDYFLALFPVFTLSTSFPVIAVTLRSNLQA<br>LLSPSTPYCIRQIIVPAFGVIAPVLLAVVDDVNTLVGFTGS<br>YAGTGIQYLIPAFLLISAKSAVPPELARYRNPFPASPFRSTTW<br>LVLVICWSIVCITFVSINLIK Y |
| <i>NIAAAP20</i><br>( <i>Nlug02695-TA</i> ) | MAAHLFNFQLIINEKPKRGMMDEERVPLLWKAPTTEKQY<br>NEGSRREGSKSSSIQGLSLLSATLCIVDLFGVFPVVTMPR                                                                                                                                                                                                                                                                                                                                                                                                                                                                                            |

|                                            |                                                                                                                                                                                                                                                                                                                                                                                                                                                                                                                                                                                                                                        |
|--------------------------------------------|----------------------------------------------------------------------------------------------------------------------------------------------------------------------------------------------------------------------------------------------------------------------------------------------------------------------------------------------------------------------------------------------------------------------------------------------------------------------------------------------------------------------------------------------------------------------------------------------------------------------------------------|
|                                            | <p> IIINCGWFGFPLVLGVILQVYTALLLGRCWIMAERLQPSI<br/> VKQSRRPYAALAEMTYGESFARLVTFILDITVFGAGVPNLI<br/> VVVSSMTVTTVSLLTWHCFMASDVATPPPLPSISWEAIAI<br/> GYGVLAFAQFDIHPTILTIQVDMADKGKIGCAVIIGFLVTGT<br/> LFLTTSVLGAIYYSTELDYNVMQTLQPSLVMDINVLLVIL<br/> QICLSTVIGATPLFQDLEDKLGVDKEFNLKRILLRSGLVML<br/> SLALAEMVPRFDLIMGLIGGTLMGPLMFVLPPLFYARLRA<br/> MEPQPQLRPVATRNTETATIITVAFAPQPPDQIEYSMKQTH<br/> YTNPRRSQKPRRSKQTFEGKSSYNLIPKEKYLDLPSPTS<br/> QPNFFTKIKSNFLNLATLDDYPKIGPMTAWERLKTAVVVI<br/> AGVSATLISTYYSVRGTIRYARFAPPCLFNVTAATLAIED </p>                                                                                                      |
| <i>NlAAP21</i><br>(Nlug04947-TA)           | <p> MFKWKYKRIYQMIEYKHYLKKKIQKDTVFKSVTIKLNPG<br/> KNVNLGDSENCFRKAITYSCAYLQESRAADKNLVTYLQS<br/> TQDTGSYQMSRGGTFSMGESTDDFGGEFGGEGKSRHKIN<br/> EWQAAWNVTNAIQGMFIVSLPFAVLRGGYWAIFAMIGIA<br/> YICCYTGKILVECLYELDTSTGQRIRVRDSYVGIARECFGP<br/> VWGARA VNC AQMIELLMTCILYVVVCGDLMGGTFPDGSI<br/> DTRSWMMLTGILLIPLGFLKSLHHVSLLSFWCTMAHLVIN<br/> AVILGYCLLEIGDWGWSKVKWTLDLENFISLGIVVFSYT<br/> SQIFLPSLEGNLIDRSKFSWMLDWSHIAAAIFKSLFGYVCF<br/> LTFQNDTQQVITNNLPSAGLRGLVNFVLVIKAILSYPYPY<br/> AACELLEKSFFRGKPEPFPFSIWHLDGELKVWG LAFRIGI<br/> VFFTIMMAIFIPHFAILMGFIGSFTGTMLSFIWPCYFHLKLK<br/> GDSLDFGT VAYDCFVIFLG VVFGVIGVYDSGSALIKAFEIG<br/> LPF </p> |
| <i>HaAAP01</i><br>(rna-<br>XM_021337951.1) | <p> MPRRFWGLRRLIRMPLTEAGDQYSVWVGLIYVFNLIVGT<br/> GALTLPAAAFARAGWGLSTISLMFLAFMSFLNATYVIETMA<br/> CANAVFKWKRLQTIKRESIQDHESDEDPSTSQNNHGDLE<br/> EPLVCGDNIPSRYSLDRRVELGEMANLFFNKIGRTTFYC<br/> SLCIYLYGDLSIYSA AVAKSIMDVVCTPIPPNMTDSKVWD<br/> ELPCFNISSTDRTGYTRFD TYRVALLTFVAAMGPFVFFNV<br/> QKTKYLQLFTSGMRWLAFTIMISMAIHLLVGRGAQGHPP<br/> AFDVTGLPTLFGACVYSFMCHHSLPGLIAPIRGKSRLGLH<br/> LFFDYAIIAMFYLLLAFTGAFAFAHLNDLYTLNFIPADNDN<br/> IFLEVVEYFLALFPVFTLSTSFPIIAITLRNNLQSLFLDTTRL<br/> ESYNFVLRKVLFPITVPPVLLTYFLEDISILIEFTGSYAGT<br/> GIQYFIPTFLVVSARRHCTNLLGLGVVNKYKSPFSHVAWA<br/> IFVLLWSFMCIILVSVNIFEKNL </p>                           |
| <i>HaAAP02</i><br>(rna-<br>XM_021327065.1) | <p> MNLNMENGSVRSSIENVPSTTQSTITLDRKDDDKDEKND<br/> YNPFEHRDVVHPTSTLGAFFHLLKSSLGSGLLAMPAAFR<br/> NTGLIPGCIGTVLVGVIA THCVHILVSTSRAVSKNCRAPSL<br/> SYTDTCEEVFKQGPKKLQQYSKHIRHFVDAAMAGVCLG<br/> GTSVYVIFIASSLKDICDHFVPSKKFEVEVYCGILLPLILIT<br/> QIRHLKFLVPFSVLANVCLVVTFGITCFYTFTDLKPLENIE </p>                                                                                                                                                                                                                                                                                                                                               |

|                                                             |                                                                                                                                                                                                                                                                                                                                                                                                                                                                                                                                                          |
|-------------------------------------------------------------|----------------------------------------------------------------------------------------------------------------------------------------------------------------------------------------------------------------------------------------------------------------------------------------------------------------------------------------------------------------------------------------------------------------------------------------------------------------------------------------------------------------------------------------------------------|
|                                                             | MVASVEKWPLFLSTAIFAMEGINVVMMPVENEMAKPQHFL<br>GCPSVLNVTMVFVTILYGVVGIFGYMKYGEGVLGSITLN<br>LPEGENLALTAKILVAVAVFFTYCLQMYAPMDIIWTRIKCR<br>ISKNYFNFSQITLRTLSTVTLTVVLAVAVPDLELLIGLVGAIF<br>FSTLGLLIPVVVQTVHLWEKGLGKFSYILWKNALLLIFYFI<br>VLVSGCYTAVSEILKFR                                                                                                                                                                                                                                                                                                        |
| <i>HaAAAP03</i><br>( <i>rna-</i><br><i>XM_021327047.1</i> ) | MAKAKESMEIDNFKSTADLTSNPGFQSSLSIASKNVDEKP<br>YNPFEHRTVEHPNSTIGSIVHLLKCCLGSGILAMPAAFKNS<br>GLIVGAIGTLIAGFVCTHTVHILVKTSQEVCVDAKKPSLSF<br>AETCGAAFTYGPKKLQSWGNSIKVIVDYSMVVITYFSVLC<br>VYVVFISGSSMKEVMDVYMPDNPISIQACCAITLVPLVLIC<br>QIRNLKYLVPFSALANILLVFVITLYYVFVDLPPLKERE<br>MVASITQWPLFLSTVIFAMEGIGVVMMPVENEMAKPQQFL<br>GCPGVLNVAMVIVISLYGFVGFFGYVQYGDMVKGSITLN<br>LPEEDVIAQVAKALMAFVIFLSFALQFYVPMEMITRKRKG<br>KESKYENFVQIAIRTMVTVAVAIAAAFPNLELVISFVGAV<br>FFSTLGLLIPAVVDTVYHWDSGLGPFNYVLWKNLLIGIISII<br>ALVSGAYVSVQGMIEDFGSSSHEAFDNATLT                   |
| <i>HaAAAP04</i><br>( <i>rna-</i><br><i>XM_021327029.1</i> ) | MGNDEKKGSIVLENFNSTANLASNPGFQSTLSLGSKEVIN<br>EKAYNPFEHRKVEHPNSTIGSLVHLLKSSLGSGILAMPAAF<br>KNAGLAAGAIGTLVVGFICTHCYVVLVKTSQEVCVDAKK<br>PSMGFAETCGAAFEFGPKRLRPWANFARTFVDYAMTCTY<br>LAALCVYIVFIAENFKEVLDEYIPEYKLSVEAYCALTLPPL<br>VLICQIRNLKWLVPFSAIANVFLVICFAITMYIYFSDLPKPE<br>GRVVVASVTQWPLFISTVIFAMEGIGVVMMPVENEMAKPQ<br>QFLGCPGVLNVAMTIVISLYGIVGFFGYMKYGDDVRGSV<br>TLNLPQDEVLAQSAKILMALAILFTYSLQFYVPMEMIWR<br>QLHNKVSRYHNITQIAIRTTAVVGSVALAAAFPDLELFIN<br>LSGAIFLSTLGLLTPAIIDTVHKWDRGLGPFKWILWKNIFI<br>AMISLVALFAGSYTSIRSMVDKIFYETPVLEIVANVTSVSM<br>NDTLSV |
| <i>HaAAAP05</i><br>( <i>rna-</i><br><i>XM_021327054.1</i> ) | MSTRYGRALKMFGDVCEQITAFGLGIELAYNGSKEDLE<br>PYIPSQHRPIASNTSSFGALAHLLKASLGSGVLAMPLAFK<br>NAGLAVGSGVGTLIIGLICCHVIHVLVKTSQKLCVEVRKPA<br>LGYADTCDLVFQHGPKPVRKVAPFIRELADWALAVTHMG<br>ACCVYVVVIAESFRQVSMVYGGPDWSVTVYCALSLVVL<br>LPLTQITKLKYLVPFSALANFVWLGSICICLYYCLKDHPKV<br>SERKLATSISGIPTFISTSLFAMEGIGVVMPIENEMRKPQDF<br>LGCPGVLNAAFTVIAMVYAFVGFVGYLRFGEDEVGRSLTL<br>NLPQEEVLAQTAKLLVGCVLLLSFTLVYYVPIDVIWRRLE<br>HRIPLSGRRWGLAGVRFVGCLLLVGIAAAMPKLELFMELV<br>GAVCLSVMGLLLPAIVETVFRWNRDIVPCSFVWKNVIIG<br>FFSIAMGSGVTYAILAIVNTM                                  |
| <i>HaAAAP06</i>                                             | MRKSSLAQDTSSRRLPGQEARRLSGQEARRLSGQEARRL                                                                                                                                                                                                                                                                                                                                                                                                                                                                                                                  |



|                                                                    |                                                                                                                                                                                                                                                                                                                                                                                                                                                                                                                                                             |
|--------------------------------------------------------------------|-------------------------------------------------------------------------------------------------------------------------------------------------------------------------------------------------------------------------------------------------------------------------------------------------------------------------------------------------------------------------------------------------------------------------------------------------------------------------------------------------------------------------------------------------------------|
| <p>(<i>rna-</i><br/><i>XM_021327435.1</i>)</p>                     | <p>SGQETRRLSGQESRRLFGDEPLSTIDFRRTRLPSMRPDLDD<br/>YDPRDHRKPVHKKVWMAYSNLFRATTGVGMLAMPFIIS<br/>TTGILLGPILCLLTGILMIHAHSLLLDTLYEVARQLKMPYIS<br/>YRYAFRLALLHGPPIFHGIANYGPIIIATCLFVSQLGICSVIV<br/>IFTTDCLRDLMDWQASQTALISLIFPYFVMEFFMRNFTIVS<br/>YVAVIGTILNLLGIALVFEQLIEEAQGETIRFSAMLNYVLFS<br/>FGVMQFNLCAGVVMMAVDKHLENPRVMRARFGVINVGI<br/>MIPTIITLIFGTVGWYWGFGTMEENILRCLPFQERTSLATVCI<br/>YMLAMILTYPLQSAPAIHAILEVVKYYEKPWWPQPS EDTL<br/>FAIENISKPIFVVL SFLICYIVPFQAPFLAFVGNLCASMLAL<br/>VFPVMDLCLRYPHYYGKHNHLHFKDMAMIFVGIASILF<br/>GCIFTTELINIRLKT KYSPNSY GFF</p> |
| <p><i>HaAAAP07</i><br/>(<i>rna-</i><br/><i>XM_021328263.1</i>)</p> | <p>MNVEKAEKREYNPF EHRQVEKPTSDIRSCANLIKSSLGS<br/>GLLAGPLAFANAGWGVGLFGTLLVGVICGHCIHILVRTSQ<br/>KCCVLDKKPSLGYAETCKSAFMNGPKGIRRFANIASVFAE<br/>FALFCTYTGVCCIYTVLISDSVKQLVDYAPSTILPVEYYC<br/>LIFLVPIILLCQIKYLKFLAIFSGLANILLTVYIVCLYYIFG<br/>GDITFAGKHAAGNPARYPAFLSTVIFAMEGVGVVMPIENT<br/>MKKPQNFLGCPSVLVVAMSAIVFLYGTLMFGYLRYGDI<br/>LRGSITLNLPTDEWPAILAKVSIALSIFLTYPLQFYVVIDIFT<br/>RYTQHRIKENYRQITQVVARTIGVCCCVGIGMALPMLEQI<br/>LNIVGALFY SILGLIIPSVIETVFRWENLGKWNWILWKNTF<br/>IALFGLLSLVSGCTVTIMDIIEILNRKTE</p>                                                 |
| <p><i>HaAAAP08</i><br/>(<i>rna-</i><br/><i>XM_021328232.1</i>)</p> | <p>MIEKKEKSKNVEDYNPF EHRDVVKPNSDMRSLANLIKAS<br/>LGSGLLAMPLAFANAGWGVGIVGTVIVAFICGHCVHIFVE<br/>TSRGCCRAERKPLITYSETCGAAFANGPKCVRPFANFAH<br/>MFAEFSLCFTYLGVCIFTLLIATSIKQLFD TYLSTPPIPVG<br/>QYCLFLLLPLCLLCQIRHLKWLAPFSLIANVLLFATFAICL<br/>YYIFREPLTFSDKQIVGDMSRLPAFLSTVIFAMEGIGVVMP<br/>VENTMKKPQHFLGCP SVMVIAMTLVMLLYIMLG VFGYL<br/>RYGEALRG TITLNLPMDAWPAICAKVFISITIFLTYPLHFFV<br/>VIDIFTRYVEPRVQKKYHNVMQICVRIFIVCF CGGIGIALP<br/>LLEQIINLVGALFY SILGLIIPGIVETVFRWEDLGKYNWILY<br/>KNILIVFCGMFSLVSGCTVTISDAIEMIHKQME</p>                                       |
| <p><i>HaAAAP09</i><br/>(<i>rna-</i><br/><i>XM_021328152.1</i>)</p> | <p>MTNSYNMKEFSSTAVITENGLYPSTISISTINTKCKDNDLE<br/>CNAYDPFQNRKLEHPNSDMR SFANLLKSSLGSGILAMPA<br/>AFKNAGTLVGIVGTIILGYICTHCVYLLVKTSQEVS RVTRV<br/>PSLGYAETVEAVFATGPPPLRKISRGARIFIDWAMAFTILG<br/>ACAVYVILLVESVQQIVDFYFVDNEISK TMYCLMFLVPILI<br/>FTQIKNLKYLAPFSGFANVLLVLTFLICLYYICSDFPPI SDK<br/>PMAVDIGKLPLFIGTVIFAMEGIGVVL PVENTMAKPNHFL<br/>GCPGVLNITMSVVVLLYMFMGFLGYVRYGDLA QGSITLN<br/>LDTSEIPALTAKVFIIFAIFFTYTLQFYVPMEIVWRNTKGYV<br/>TQKYHNIAQGVIRAVFAVLTVIAAATLPRLEQVIGLEGAFF</p>                                                                           |

|                                                             |                                                                                                                                                                                                                                                                                                                                                                                                                                                                                                                                                                                                                                                                                                                                                                                                                                                                                                                                                                   |
|-------------------------------------------------------------|-------------------------------------------------------------------------------------------------------------------------------------------------------------------------------------------------------------------------------------------------------------------------------------------------------------------------------------------------------------------------------------------------------------------------------------------------------------------------------------------------------------------------------------------------------------------------------------------------------------------------------------------------------------------------------------------------------------------------------------------------------------------------------------------------------------------------------------------------------------------------------------------------------------------------------------------------------------------|
|                                                             | YSFLGLIAPSLMDVIFKWNRLGLGKYNWILVKDVILIAFGS<br>FVLVAGVTQSIREIIKTN                                                                                                                                                                                                                                                                                                                                                                                                                                                                                                                                                                                                                                                                                                                                                                                                                                                                                                   |
| <i>HaAAAP10</i><br>( <i>rna-</i><br><i>XM_021328488.1</i> ) | MGTTGQSITLANSIIGVGILAMPFCFQQCGVLLATLILLFM<br>GLVSRLCCHFLKLSALLARRRNFEFLAFHVFGQAGKIAVE<br>VGIIIGFLMGTCIAYFVVVGDLGPQIIAKMFNINQSDILRTSI<br>MVIVSIVCVLPLGLLRNVDSLSNVSAATIAFYFCLVMKVI<br>EAAGVMLTSDWNQVRVEMWRPAGLLQCVPIFSMALFCQT<br>QLFEIFESLPTLSLEKMNIIVTKXXXXXCTAVYFTLGMFGY<br>VAFASRDISGNILMSLSPTMASDVIKLGFMVMSLAFSFLIIF<br>PCRASLYSFLYKKVHSSSHDHIINHSIPETTFRCITVGIVGV<br>EIKKDIRKDSEIQPPNPVPPESQSNEKLPQTKKIIKTEEKIL<br>KPEIKEALDKVSETHPRNLKNKLESKLANGISNGEAQKTN<br>EVK PQSNEDKIDMIKQQKLIETIKQHGEEQKELIKEQKEIL<br>DEILKTKKELQQNKNEAEGAIEAKKIAVESIKQIADMAIKS<br>IGGVSEKPDVKDEVKAERLEKLTNDVQEIAKKAVETIEA<br>IQEIKEKPEQPIAAPQNNLPNVQVQNIPAQNVPAQNVQPAI<br>PVNPQVIQGANDLVKPKDQAPNNVAANVLPQVNGAVVN<br>QNGAAVQNNANQQLKREVKPAIEIAKENAQVPNIQPKIP<br>ENNAQNQPKVDNVNKPVLNAEVGAEKPHSHSPDEPQSY<br>KQGEDTQAKVPENKVVQNVPIVSNELANNQMKINRQPA<br>AIQPNKDDIKVNVPPKVQNNGAKPNLQANVPPNSNLQQ<br>IVNQA HARQKREVVDCTKKVTLKPEDKAICRNLDGNGK<br>DSQEILKSVDLNEVALPKSLPLDVNVLHHISRALKSFDKDE<br>R |
| <i>HaAAAP11</i><br>( <i>rna-</i><br><i>XM_021329232.1</i> ) | MSKKHLHNQA AIP LAPAVFKKPQMRPMIVEYDPKKKGV<br>KNDLSDVVMVYKYNPNEIPVEQEAGSTLPLMEIPGRDIE<br>ADEDYNPFHRKLAHPTSDMDTLIHLLKGS LGSGILAMP<br>MAFRNAGLYFGLIATFAIGGICTYCVHVLVKT AHEL CRRL<br>QKPSLGFAETA EA A FL SGPPAVHKFSRLAKAMINWFLVID<br>LLGCCCVYIVFVAKNVKQVVD FYATGSDWYDV DVRIYM<br>AVLLPLLILMNLIRNLKY LAPFSMIANLLVGTGMGITFYYL<br>FQEVPSLSERLPFTSVDR LPTFFGT AIFALEGIGVVMPLN<br>NMKTPTHFIGCPGV LNTGMFFVVS LYAFTGFFGYLKYGP<br>DTKSSITLNL PQDEV LGQC VKLMIAVAIFFTYSLQFYVPM<br>EIIWK NVRHWF GAKKNLAEYSIRIGI IILTLGT AIAIPNLGPF<br>ISLVGAVCLSFLGLIFPAVIETV TYWDRPNGLGRFNWVLW<br>KNLFLVSFGILGFLT GAYVSVLDIIHGEE                                                                                                                                                                                                                                                                                                                                                                |
| <i>HaAAAP12</i><br>( <i>rna-</i><br><i>XM_021331270.1</i> ) | MVNEANGNAPAPQELETFLSQDEKKKEKVVS KYNMTKD<br>LESADFPDPTERKLENPTSNMDTLTHLLKAS LGTGILAMP<br>KAFKCAGLVSGIFFTMLVALICTHCSYVLICAHVLYKKT<br>KRTQMTFPEVGQTAFENGPEKFRPWGN AFRIFILVSLFLTY<br>FGTCSVYTVIIAKNIVQVVAH HMGVEEDKVDIRLFILALL<br>LPLIFMAWIRNLKY LAPVSMVANVFMGIGLGITFY YLVGT<br>GSLQTDKINSMLIKAPVEWPEFFSLSIFAMEAIGVVMPL                                                                                                                                                                                                                                                                                                                                                                                                                                                                                                                                                                                                                                               |

|                                                             |                                                                                                                                                                                                                                                                                                                                                                                                                                                                                                                                                                                                        |
|-------------------------------------------------------------|--------------------------------------------------------------------------------------------------------------------------------------------------------------------------------------------------------------------------------------------------------------------------------------------------------------------------------------------------------------------------------------------------------------------------------------------------------------------------------------------------------------------------------------------------------------------------------------------------------|
|                                                             | NAMKTPKAMLGLCGVLNKGMSGVTLVYILLGFLGYLRY<br>GEDVKDSITLNLSENSEYPAQIVKISIAIAVYCTYGLQFFVC<br>VEIMWNSIKDKFTKRPDLDYIMRTILVTACVLLAVAVPTI<br>GPFMGVIGAFCSILGLIAPALIEVITYWDIGFGPTKYLIWK<br>NIIVVIFGLFALVFGTKDAIKEIIRVYSQ                                                                                                                                                                                                                                                                                                                                                                                         |
| <i>HaAAAP13</i><br>( <i>rna-</i><br><i>XM_021332347.1</i> ) | MPKNILAEMGSQVGLTPRQNKKEAEEWARRQSGPMVNP<br>SFEPDDFLPQSLSPVKDEKKRPGDKSIFLVNMKEKNIPEVE<br>EYEPYDNRVVDHPTTNMETFLHLMKGS LGTGILAMPKAF<br>SNAGYVVGSGVTVIIIGVLCTYCIHILIDSCYVLCKRRKVPS<br>LSYTA AA EAALLEGPDWCKACAPYAAHV VNAFLLVYQI<br>GTCCVYVVFVSDNIYFVLTKHFGIEITVFQVMLCVLLPLIL<br>INWVRDLKYLAPFSAIANAVTIVSFGMILYYIFRDTPTLEG<br>KVPAGKLANFPLFFGTVLFALFAIGVILPLENEMKTPRDF<br>VGKFGVLNCSMISIIIVLYVGMGLFGYLQYGDESAGSITLN<br>LPNTEILANVVQCLLAFAIFITHGLACYVAIDILWNEYIGIR<br>MLNNKHRLIWEYLLRTVIVLLTFGIAAAVPALELFISLFGA<br>LCLSALGLAFPALIQSCTYWYYVSRSERIRMIVKNAIVVL<br>FGALGLVVGTWTSLERIIATFGTSVIETASNHTMAQNETLT<br>P |
| <i>HaAAAP14</i><br>( <i>rna-</i><br><i>XM_021334515.1</i> ) | MNDEKQPLLTGPSNSIDSIEQPVELVTAPVATSATSGKPKS<br>DYHPAAERRLEHPTSNFDTLIHLLKGNIGTGILAMPDAFK<br>NAGLIIGVFGTLLMG TIC THCMHMLIKCAHELCIRSQKPA<br>LGFSEVVEDSFALGPISVRPYAKTMKNIVSVFLVITQLGFC<br>CVYFLFVATNLQDTMHFFHINLSVHAYLALLFPPIALAM<br>VKNLKYLTVPVSLVASIMTAWGLVITFYIYLQDLPATNTVDA<br>FSSWHQLPLYFGTAIYAFEGIGVILPLENNMKTPEDFGGW<br>NGVLNTGMVIVAALYTAIGFFGYLKYGDHVLGSITLNLPN<br>TLAQSVRAVMAASIFLSYGLQFYVPMNIVWPYVKS KLT<br>SEQALKHGEAVTRFVLISITFLAAALIPNLSGIISLVGAFSSS<br>ALALIFPPVIEIMTFWPDQLGRYQWMLYKDIFIFFGFTGF<br>VFGTFINVKNIFF                                                                               |
| <i>HaAAAP15</i><br>( <i>rna-</i><br><i>XM_021336598.1</i> ) | MPSILENIWPTSVISHHEDYTVGETTGGLSVLFTILCIVDLF<br>GVFPVITLPKSVISCGIYGLPLVLSVFGLQLYTAVLLGKSW<br>LLAQKITPDIKEKNRFPYAAIAELAFGPSAKTLVTF LIDAA<br>VFGSGVPNFIIASQTLQIFWWKISGGEIGITYCVWMVILAL<br>LLCPVMWL GSPKDMKPLAISSVLIVATVAVTIWT CILRDY<br>TSPTPVDNMVALEPQLEDFLIAYGILAFQFDIHPMLLT LQV<br>DMKDSKKINA AVLGGFGVTGCMFAVTTILA AVRYGTALD<br>NNILQSIPSSIPLYLVSLLVTLQLCLSSAVSHSALFQHFEDIL<br>KIPRDFCFRRCLLRSSVVALAVVLAESVPRFDLVMGLVGS<br>TLTGPLMFICPPVFFLKL CYMKSKTPSNFFKLSEKRNGTQ<br>NGGFKNGDLSKSP LILDALQPRYRTFTEYAVEVTEDDDYS<br>IRWYDIIFALIVMTLGIVATIVATYSSWSNSIAYATFSPCLM<br>NATAAARSFLEIPMAI                     |

|                                                  |                                                                                                                                                                                                                                                                                                                                                                                                                                                                                                                                    |
|--------------------------------------------------|------------------------------------------------------------------------------------------------------------------------------------------------------------------------------------------------------------------------------------------------------------------------------------------------------------------------------------------------------------------------------------------------------------------------------------------------------------------------------------------------------------------------------------|
| <i>HaAAAP16</i><br>( <i>rna-XM_021337064.1</i> ) | MNEGLFFSLFCFQRSPTPSLYTLDRDIKNYIHKRESHSEY<br>YPGTERTVYDYIEERNDMYNTNLIESTAHLIKGSLGAGAL<br>SMHEAYMYGGLWTSLVVTIVIGITISYTMLMLIRSAQKM<br>YRRLRISKLSYPDLAEAAACATSPWRFVRKLSKPFYRLVDA<br>CIIFEMCGTCCYQIMIGSSIKQMFEGIDYEFKRVMGIRLY<br>ILISAPILLPLCQIRSLKFLAPFSMLADVVALCVLTTLYYS<br>LITLNANITDRYAWKNIHGFFRIAGICMYTTSGICVALPVE<br>NNMKRPRYFPQAVRLGMFLTIVVLTTLVTGTFVGYWAW<br>GESCKSPITVHMPLNIFTTILQFLLIMMLSTSFAVQFWVPF<br>RIIWHYLVRRYKRKQAIWERVHRLIMGLIVMAFTMLFPN<br>VISVMIFLGQFFMGLVALVFPATIEIMVDWEEAYSHRARVR<br>LCQHVKNFTLITMGLMLSLSLTLYSVMDT |
| <i>HaAAAP17</i><br>( <i>rna-XM_021337048.1</i> ) | MELKPNEGRPGHTTHSTHVRHHTTPERRFVDRSAEGEYN<br>YVAARNNAKPTNVLESTGHLLIKGCLGGGILGIHEAYMKC<br>GLWTSFFMTIMFGFYISYCVHILVSSAHKLYGRLHLATLS<br>YPDVAEAAALAIGPFPKLRKYSKMFYAVDVIICIDLFGACC<br>VYQIIIAKTIQQLTSLGQDSTSISYLRLFIALLVPILLCMIT<br>TLKYLAPFSLVADFFIVACVIATIAYSKLIAPPIEDVPGWKN<br>AMGFFEFSGVVVFVSMGVGVALPIENNMKEPKRFIVVLC<br>AGMSVVVTFVLLVGFFGYWGFGEKCSIPVTLNFPSEIFPTI<br>LKVLIALMIFVXFALNYWAPFNLVWYYLAKRHDSSKHWI<br>WERVYRAVFIIITHISVIFPNIGNLMGLLGAFCLSNMGFIFP<br>ALIDLLVVWENPGLGTLKWRLWKNVILIAGFMLFVAGT<br>YSNAKGLLFTTYE               |
| <i>HaAAAP18</i><br>( <i>rna-XM_021337340.1</i> ) | MMEESNKSETVHLQPVGEGAGEGFKDSASEYYDPHEHR<br>QLPKPTNNWETLVHLLKCSLGTGILAMPQAFARAGLVGTI<br>LATIIVGALVTHCLHVLVRSQYAACKRLRVPLLTYPQSMS<br>AALEAGPPPLRRFAGSLATTVDVFLVVYQLGICCVYIVFIA<br>DNIKKMVDPPYYTMAVEIHMLIILLPLIAFNLIPLSKLLAPFS<br>AVANVLTFVGLGIVVYYLLTNKKSDAPLDLWGPSTFPLF<br>FGTILFALTAVGVVIALENMMPKAFGAPCGVLNSGMVII<br>VLLYVAVGALGYVFCVSECSDSVTLDPQALANSVIAM<br>FAIAIFISYGLHCYVPVEVVWRGYLLPRLQRSCTPPARLRV<br>AEYALRVVLCLLTFVLAVAVPRLGLFISLFGALCLSALGICF<br>PALMEMCVSFPDKFGPGRVRLKDVLLFIVGVVGMVAGT<br>YTALLSIVRSFMPPDTEPLHA            |
| <i>HaAAAP19</i><br>( <i>rna-XM_021337359.1</i> ) | MFDVFRLASPGGQPLQPPEFDASFDPHKHKRVPHPTSY<br>GETMTHMLKACFGAGMLAMPNAFARLGLIFGIVGIIFLG<br>VFATYCIQILVLGQYQICKKWRVGYMSYPKSMRLAVQSG<br>PPCLRWSAAIFENAVDGILLFWQIGVCAIFLVFAENLKQV<br>CLYAGHELRLVLIICLYPILVILVLDLKLAPLSTFANG<br>CTIIGLVLIFFYLVEDDVQVDESHFALKSLTDIPIFIGIVLYA<br>LEAVGVILALEYNMDNPADFTGLFGLFSIGMSIIVLIYTAL<br>GVCGYLKYGMDSKASITLNLQDQKKSHAAKMAFTLAV                                                                                                                                                                            |

|                                                             |                                                                                                                                                                                                                                                                                                                                                                                                                                                                                                             |
|-------------------------------------------------------------|-------------------------------------------------------------------------------------------------------------------------------------------------------------------------------------------------------------------------------------------------------------------------------------------------------------------------------------------------------------------------------------------------------------------------------------------------------------------------------------------------------------|
|                                                             | FSSFPLQNFVAWQILWQNYLEKKYKGTKKEKVADYGLRI<br>LCTTIPFVMALIAPALGPFIGLIGSFCLSMVAILFPAVVDISV<br>WYPDKYGP GK YKLFTDIFIIFGIFCCCSGVYTSLLEMVET<br>LSK                                                                                                                                                                                                                                                                                                                                                                 |
| <i>HaAAAP20</i><br>( <i>rna-</i><br><i>XM_021337338.1</i> ) | MFIYKFVGF GFDDTATDESTDAYDPHAHRIVAKPCTYGET<br>MMHMLKGCLGAGLLAMPNAVARMGIVLGALGIIFIGAF<br>TYCIQILVLAQYQLCKRHRRGY MAYTKSIRVAILGGPPQL<br>HWSANCFANLVDFFLVFWQIGICAIYFVFVAENVKQVVEF<br>IGYEVTVRRVICYSYPPLLICSLVKDLKLLTPFSTISNACVL<br>VGLVLVFFYLVEDDVVLDEDKYKVKGLEDIPIFIGITL FAL<br>EAVGVILALEYNMEKPREFTGFCGLFSVGMMIILATYIAL<br>GVFGYLKYGNECKGSITLNL PQDEKKAQVAKLTFTIALFL<br>SYPLQNFVAWQIVWRKTHKKVSDKWKRTVDYALRVILAT<br>IPFGMAAAAPSLGAFMGLLGALCLTMVAILFPALMDLCV<br>YYPNRYGFMRWKLWSDIFIIVFGMVCCASGVYTSVLEMV<br>ETYDL |
| <i>HaAAAP21</i><br>( <i>rna-</i><br><i>XM_021337468.1</i> ) | MISRNLKELVEGDENLSDDGNPPLRVYILSMMLPCMVC<br>MVSNLKYLAPFALIAVIYCVAVMVM TVWYACKNDKLMP<br>WDRPSYKNMMGFVKLIGMCIFVTETASVALPIENNMNTP<br>KKFHYVMVSAMPIVTLLMMTIGFCGYWNYGEIAFSPITV<br>HFPDPFSIQLKVFLCILLYVMIAIYSYCAFDVEWFYFKRL<br>HKPANYWFWERVYRSLHVVIDLIAAAPT VSGTMSIIGC<br>MFTNPVFFYPQLIEMLCWDYPGLGRHNWRLVKCIFIMF<br>ISLVIMLGGTGLNVYRMIYDMYIKPRGRVVS NATTESNFF<br>DITGRLRSFNGDY                                                                                                                                      |
| <i>HaAAAP22</i><br>( <i>rna-</i><br><i>XM_021337469.1</i> ) | MGLFEFMSVCTFVLEPVS YALPVENNMNEPKKFHNVM<br>AMSINTVAMITVGFVGF WHYGNFAVSPITIHLPFSPFALT<br>KVGLCIILYVIYSMCFYVAFDIEWFYLKRHHQMSNYWFW<br>ERLYRTIHVILIMVSYCLPNVTRLMGIIGALCTSPAVFIYPY<br>FIELLDWEHPGLGRCKWRLRFIVMLTFGLVL FVAGTY<br>NGLGMYLELENRPKANISFDPENQMPELERKEINFEIGTE<br>LSVDPKKRLNLTDEGKHNYDLNVALPYEVPYNLFDQNLN<br>ANYSTKKANIVFDHTM                                                                                                                                                                           |
| <i>HaAAAP23</i><br>( <i>rna-</i><br><i>XM_021339027.1</i> ) | MSKKVLEPRAKAGVSSENVSETTPLVGKKGEGDEEGRGL<br>TTQQTAILIAGEMAGSGVLALPRALSKTGWFGVPLLLLVA<br>LVAAFSGKRLGDCWSILEARDPEMRTRKRNPYAIIVEQAL<br>GKPWSVVVSMAMIVTLFGASVVYLLLA AQIIEAVLLSLVP<br>TLTICTWYLIVVGAMTPLLFFGTPKDFHLMGILAFGSSLVA<br>CILYFIEMMNEVSPFTYRYGIHGFMDFLATGTMMFAFGG<br>ASTFPTIQNDMADKTKFGKSVQYGF LAVLILYLLVAIAGY<br>AVYGERVLPNVALSMSATPLTLAANILMAVHLLSAFIIINP<br>VCQEVEELYNVPRDSTGWRMIVRVSIMLGILFIGESIPRFY<br>TLLALVGATTIALLT YILPSVCYLKLIGQPAGEGQTPVEVP<br>SWMKMVCYEVI ALGVVGCIAATISAVSAIFSTSM AVPCYL     |

|                                                 |                                                                                                                                                                                                                                                                                                                                                                                                                                                                                                                                                                                                           |
|-------------------------------------------------|-----------------------------------------------------------------------------------------------------------------------------------------------------------------------------------------------------------------------------------------------------------------------------------------------------------------------------------------------------------------------------------------------------------------------------------------------------------------------------------------------------------------------------------------------------------------------------------------------------------|
| <i>HaAAP24</i><br>( <i>rna-XM_021341781.1</i> ) | MRFVEKIAKQAREPDSAASSVRSVDSYEIFGSACSDFTDC<br>EYCEDRRKRYKKYNKYHSPSITSHSYYSAMSRAEAEPLL<br>QGAVTPTYRAVSVESIDSLGPAELSSDAVLETFNKTFEKT<br>KPDTKKQSSLVTIFSVWNTIMGSSLLTMAWGVERAGLPA<br>ALVLVAFMAALCLYTAYVLLRVNKHGSDSCEVPALCRT<br>LLGQWAEVVAHIFSLLVLLGANIVYWILITNFLYFTVNYF<br>VDLNSSNETIYNTSLLCPRHLNESLLIAEPEADSAYWGLH<br>TTVPIYVALIVFPLLNFKNVSFFTKFNSLGTLSVAYLLIFVL<br>VKGYAWGIHIGELFTQTHAIRNAAVLSGMLALSFYIHNI<br>TIMSNNARQDKNGRDLTIAFLLVTVTYTLVGAVFYICFPL<br>AKSCIEDNLLNFMHDMTAVARMLLLFQVVTVYPLVA<br>FMLRSEAILLLPFKETRGLTIINISIMAMCILVACFCPSIGT<br>RYTGAVSGLVHIFALPSLLQIRSLQFRGKLTWWKTVFYCSI<br>MVFGAVNLLMQFFIDE  |
| <i>HaAAP25</i><br>( <i>rna-XM_021342544.1</i> ) | MINLGKFKLPPLRNVLDVTMQTVRQQIPEKPGAPPRPPQN<br>VRFANLDNMGESCELSTMNETTSPSYQSTNPTNPFLSGAL<br>QAEDSFTSYQNTYPQQDGAPRTQSMQSVDFYASSEEGGG<br>FEEGGGPPGAKINEYQAAWNVTNAIQGMFVVSLPFAVLQ<br>GGYWAIAMIGIAHICCYTGKILVECLYEDDPVSGQRVRV<br>RDSYVSIKECFGRKYGARIVNLAQIHELLMTCILYVVVC<br>GDLMIGTFPDGAIDARSWMMLTGIFLLPLAFLKSLKSVM<br>LSFWCTMSHLIINAIVLGYCILNIGDWGWSKVWTLDFE<br>NFPISLGIVFSYTSQIFLPTLEGNMEDRSKFEWMLDWSHI<br>AAAAFKSIFGYLCFLTFQNDTQQVITNNLRSAGFKGLVNF<br>FLVIKAVLSYPLPYAACDLLERALFRGKPKTIFPVIYALD<br>GELKVVWGLAWRLGVIMFTILMAIFIPHFAILMGFIGSFTGT<br>MLSFIWPAYFHLKLKGNTLESTRIAYDYFIIALGVLFVIG<br>MYDSGSALIKAFKIGLPF |
| <i>HaAAP26</i><br>( <i>rna-XM_021343518.1</i> ) | MVDKKMQHEINITHISGSVSDIHEINSLSGTLPETKKQEA<br>HNGGHHVVTHTPSYADTMLHLFRGNIGTGLLAMGDAFK<br>NGGIVFSPIVTALLGIICVHAQHLLLCSEEMHRKSKRDR<br>APGFAETVYLVFASGPVSCRSMATTMKILVNGFLCVTQLG<br>FCCVYIVFIANNVKMICDQYNIHISLSIHMLFVVLPIMLAC<br>MVRNLKYLTPFSTIANIMMAFGVAVVIYAATQDLPVETR<br>VYMASWQQPLPYFGTAIYAFEGIGLVPLKNEMSNPESFQ<br>KPLGVNLVGMVVVGSIFITVGFLGYLKWGDEVLSLTN<br>LQPGEVLSNVVQSLIALAILFTYPLQFYVPIAITWPAIEKK<br>YGATHPVAKELGYRALLVILTFILAESIPELGLFISLVGAVS<br>STALALMFPPLELVSTSQKPGGIPTILIKNCFIILLGLFIFS<br>TGTYESVASIVRAFQV                                                                                        |

**Table S2.** TPM values of putative AAAP transporter genes in BPH at 15 different developmental stages.

| Gene            | egg24h | egg48h | Egg5D | 1st24h | 1st48h | 2nd24h | 2nd48h | 3rd24h | 3rd48h | 4th24h | 4th48h | 5th24h | 5th48h | A24h   | A72h   |
|-----------------|--------|--------|-------|--------|--------|--------|--------|--------|--------|--------|--------|--------|--------|--------|--------|
| <i>NIAAAP01</i> | 4.12   | 0.24   | 2.36  | 36.75  | 37.39  | 29.38  | 39.39  | 33.54  | 30.57  | 32.18  | 32.92  | 32.60  | 35.34  | 54.68  | 44.89  |
| <i>NIAAAP02</i> | 0.62   | 0.42   | 16.33 | 30.62  | 26.59  | 25.55  | 21.34  | 22.02  | 20.13  | 18.55  | 14.00  | 18.63  | 13.17  | 18.54  | 13.98  |
| <i>NIAAAP03</i> | 5.27   | 5.99   | 4.65  | 7.95   | 12.73  | 13.23  | 17.94  | 16.39  | 17.04  | 15.49  | 15.41  | 16.18  | 18.97  | 20.36  | 12.14  |
| <i>NIAAAP04</i> | 13.09  | 8.41   | 12.01 | 7.45   | 7.11   | 8.32   | 6.95   | 8.12   | 8.24   | 7.39   | 6.96   | 6.54   | 8.12   | 8.73   | 10.00  |
| <i>NIAAAP05</i> | 2.48   | 1.30   | 15.63 | 12.82  | 15.20  | 16.90  | 9.88   | 16.62  | 17.16  | 8.23   | 12.14  | 9.21   | 11.58  | 6.61   | 5.50   |
| <i>NIAAAP06</i> | 2.69   | 3.05   | 13.14 | 13.34  | 10.01  | 9.02   | 8.20   | 6.95   | 8.24   | 7.90   | 9.43   | 12.15  | 11.97  | 14.20  | 17.08  |
| <i>NIAAAP07</i> | 40.90  | 36.28  | 16.00 | 26.77  | 39.94  | 22.17  | 43.77  | 27.89  | 46.15  | 34.97  | 21.82  | 32.64  | 48.92  | 145.48 | 115.50 |
| <i>NIAAAP08</i> | 0.37   | 0.47   | 5.30  | 9.13   | 9.23   | 8.65   | 9.16   | 8.20   | 7.90   | 14.97  | 10.74  | 11.43  | 10.89  | 8.39   | 7.20   |
| <i>NIAAAP09</i> | 6.26   | 9.37   | 24.64 | 13.67  | 11.81  | 12.77  | 11.57  | 19.67  | 7.17   | 28.77  | 37.17  | 29.61  | 24.89  | 14.39  | 15.31  |
| <i>NIAAAP10</i> | 5.14   | 1.41   | 17.60 | 21.66  | 27.31  | 17.76  | 21.99  | 14.59  | 15.27  | 12.55  | 8.39   | 11.92  | 12.24  | 18.44  | 12.67  |
| <i>NIAAAP11</i> | 1.47   | 0.30   | 3.53  | 5.95   | 9.30   | 5.07   | 12.98  | 4.74   | 7.15   | 2.64   | 2.24   | 3.42   | 2.38   | 4.75   | 2.90   |
| <i>NIAAAP12</i> | 24.34  | 7.09   | 14.54 | 62.70  | 88.38  | 109.02 | 100.15 | 102.77 | 99.55  | 96.26  | 84.80  | 117.09 | 114.71 | 103.03 | 93.25  |
| <i>NIAAAP13</i> | 30.11  | 25.18  | 7.09  | 48.46  | 45.23  | 39.11  | 43.84  | 40.05  | 23.25  | 37.52  | 23.36  | 41.29  | 40.44  | 39.61  | 39.74  |
| <i>NIAAAP14</i> | 1.48   | 1.74   | 5.27  | 10.48  | 6.62   | 5.50   | 5.69   | 7.73   | 4.13   | 12.16  | 7.94   | 9.50   | 10.46  | 6.72   | 3.71   |
| <i>NIAAAP15</i> | 1.51   | 0.96   | 8.29  | 22.56  | 20.05  | 19.48  | 13.90  | 28.63  | 15.08  | 24.41  | 12.97  | 19.91  | 26.32  | 26.25  | 15.45  |
| <i>NIAAAP16</i> | 0.06   | 0.14   | 0.03  | 0.05   | 0.00   | 0.03   | 0.08   | 0.03   | 0.18   | 7.98   | 13.35  | 12.75  | 4.50   | 0.00   | 0.00   |
| <i>NIAAAP17</i> | 5.12   | 5.19   | 3.39  | 5.34   | 4.62   | 3.70   | 3.97   | 4.12   | 4.02   | 5.89   | 4.73   | 7.85   | 6.29   | 6.72   | 6.84   |
| <i>NIAAAP18</i> | 6.44   | 4.99   | 15.29 | 8.18   | 10.30  | 8.58   | 10.56  | 8.27   | 10.46  | 10.64  | 7.89   | 10.64  | 14.64  | 20.03  | 23.31  |
| <i>NIAAAP19</i> | 5.33   | 6.47   | 6.34  | 5.04   | 5.34   | 6.08   | 4.14   | 6.30   | 5.03   | 5.87   | 5.28   | 5.20   | 8.60   | 10.27  | 10.13  |
| <i>NIAAAP20</i> | 3.44   | 2.87   | 7.86  | 6.71   | 6.07   | 5.56   | 5.65   | 7.94   | 4.49   | 5.49   | 3.21   | 4.23   | 3.44   | 1.86   | 1.51   |
| <i>NIAAAP21</i> | 5.28   | 3.99   | 5.79  | 12.81  | 8.92   | 7.78   | 6.42   | 7.41   | 6.19   | 6.19   | 5.16   | 7.00   | 6.85   | 3.31   | 2.91   |

**Table S3.** TPM values of putative AAAP transporter genes in BPH at six different tissues.

| <b>Gene</b>     | <b>Head</b> | <b>Salivary Gland</b> | <b>Integument</b> | <b>Gut</b> | <b>Fat Body</b> | <b>Ovary</b> |
|-----------------|-------------|-----------------------|-------------------|------------|-----------------|--------------|
| <i>NIAAAP01</i> | 4.86        | 0.09                  | 49.08             | 76.12      | 39.64           | 1.86         |
| <i>NIAAAP02</i> | 16.21       | 6.02                  | 3.37              | 352.84     | 3.63            | 6.19         |
| <i>NIAAAP03</i> | 3.73        | 2.52                  | 3.14              | 91.03      | 0.44            | 4.96         |
| <i>NIAAAP04</i> | 3.33        | 5.00                  | 9.76              | 7.93       | 9.67            | 13.80        |
| <i>NIAAAP05</i> | 8.20        | 1.22                  | 3.39              | 19.39      | 3.74            | 7.97         |
| <i>NIAAAP06</i> | 0.31        | 0.87                  | 3.73              | 0.93       | 6.58            | 17.37        |
| <i>NIAAAP07</i> | 12.17       | 10.18                 | 83.48             | 6.20       | 29.57           | 70.85        |
| <i>NIAAAP08</i> | 2.10        | 0.57                  | 1.11              | 100.51     | 1.07            | 1.68         |
| <i>NIAAAP09</i> | 26.78       | 5.07                  | 12.78             | 93.08      | 22.02           | 4.79         |
| <i>NIAAAP10</i> | 2.12        | 0.19                  | 1.20              | 0.39       | 0.06            | 0.31         |
| <i>NIAAAP11</i> | 10.41       | 1.60                  | 3.49              | 0.55       | 0.68            | 2.22         |
| <i>NIAAAP12</i> | 42.72       | 9.02                  | 87.94             | 1362.75    | 28.37           | 53.34        |
| <i>NIAAAP13</i> | 15.41       | 7.34                  | 8.12              | 211.23     | 7.95            | 39.97        |
| <i>NIAAAP14</i> | 8.02        | 4.39                  | 7.48              | 2.39       | 1.02            | 1.32         |
| <i>NIAAAP15</i> | 18.30       | 5.23                  | 13.26             | 44.71      | 15.57           | 18.75        |
| <i>NIAAAP16</i> | 0.00        | 0.00                  | 0.00              | 0.00       | 0.08            | 0.05         |
| <i>NIAAAP17</i> | 3.01        | 0.63                  | 6.49              | 4.68       | 5.45            | 10.81        |
| <i>NIAAAP18</i> | 8.34        | 8.47                  | 15.74             | 9.35       | 17.34           | 8.85         |
| <i>NIAAAP19</i> | 0.94        | 1.73                  | 5.61              | 6.72       | 3.07            | 7.96         |
| <i>NIAAAP20</i> | 11.91       | 0.56                  | 0.51              | 0.98       | 1.41            | 1.08         |
| <i>NIAAAP21</i> | 1.39        | 0.35                  | 1.93              | 0.72       | 2.67            | 2.47         |



**Table S4.** The primers used for qPCR and RNAi experiments in this study.

| Primer                  | Primer sequence (5'-3')                             | Purpose                                   |
|-------------------------|-----------------------------------------------------|-------------------------------------------|
| <i>NIAAAP01-F</i>       | ATGGAAGTGGTGTGGTCTGC                                | Quatitative real-time PCR                 |
| <i>NIAAAP01-R</i>       | GAACGGCTATGCTGCTCAGA                                | Quatitative real-time PCR                 |
| <i>NIAAAP02-F</i>       | GAATTGGCTCCAGCATCAACG                               | Quatitative real-time PCR                 |
| <i>NIAAAP02-R</i>       | GCGCCCAAACCTGCTTTTGAT                               | Quatitative real-time PCR                 |
| <i>NIAAAP06-F</i>       | CCTCGATGGTGATCGTAGCC                                | Quatitative real-time PCR                 |
| <i>NIAAAP06-R</i>       | CCAATAAATCGCGCTGAGGC                                | Quatitative real-time PCR                 |
| <i>NIAAAP07-F</i>       | TGGGAACAGGAAACGTGAAA                                | Quatitative real-time PCR                 |
| <i>NIAAAP07-R</i>       | AAGTAGGCAGCGAACAGTCC                                | Quatitative real-time PCR                 |
| <i>NIAAAP09-F</i>       | ACTACGTTACGTTCCGGTCG                                | Quatitative real-time PCR                 |
| <i>NIAAAP09-R</i>       | TACCTGGGTTGGCGTCTCTA                                | Quatitative real-time PCR                 |
| <i>NIAAAP12-F</i>       | CGTTGGGTCCGCACAAGA                                  | Quatitative real-time PCR                 |
| <i>NIAAAP12-R</i>       | TAACCAAGGCAGGGTTGTCC                                | Quatitative real-time PCR                 |
| <i>NIAAAP13-F</i>       | TGAGATATCACGAGAATAAGGGTCG                           | Quatitative real-time PCR                 |
| <i>NIAAAP13-R</i>       | CTCTTCGGCCTCCTTACTGG                                | Quatitative real-time PCR                 |
| <i>NIAAAP16-F</i>       | AGCCATCACAAATTGCTATAAGTTCT                          | Quatitative real-time PCR                 |
| <i>NIAAAP16-R</i>       | TTCTTCGTCAATTCGGGACCA                               | Quatitative real-time PCR                 |
| <i>NIAAAP18-F</i>       | CTGAAGCATCCACCTCAGCA                                | Quatitative real-time PCR                 |
| <i>NIAAAP18-R</i>       | GTTCTGGATGGTGGGGAAGG                                | Quatitative real-time PCR                 |
| <i>NIAAAP20-F</i>       | GGCGCACCTGTTCAACTTTC                                | Quatitative real-time PCR                 |
| <i>NIAAAP20-F</i>       | CCGTTGTTGGTGCTTTCCAC                                | Quatitative real-time PCR                 |
| <i>dsNIAAAP07-F</i>     | TTGGGAACAGGAAACGTGAA                                | synthesis of dsRNA for<br><i>NIAAAP07</i> |
| <i>dsNIAAAP07-R</i>     | GCTAATCAGCACCAGTGGGA                                | synthesis of dsRNA for<br><i>NIAAAP07</i> |
| <i>T7- dsNIAAAP07-F</i> | GGATCCTAATACGACTCACTATAGG<br>TTGGGAACAGGAAACGTGAA   | synthesis of dsRNA for<br><i>NIAAAP07</i> |
| <i>T7- dsNIAAAP07-R</i> | GGATCCTAATACGACTCACTATAGG<br>GCTAATCAGCACCAGTGGGA   | synthesis of dsRNA for<br><i>NIAAAP07</i> |
| <i>dsGFP-F</i>          | AAGGGCGAGGAGCTGTTACCG                               | synthesis of dsRNA for <i>GFP</i>         |
| <i>dsGFP-R</i>          | CAGCAGGACCATGTGATCGCGC                              | synthesis of dsRNA for <i>GFP</i>         |
| <i>T7- dsGFP-F</i>      | GGATCCTAATACGACTCACTATAGG<br>AAGGGCGAGGAGCTGTTACCG  | synthesis of dsRNA for <i>GFP</i>         |
| <i>T7- dsGFP-R</i>      | GGATCCTAATACGACTCACTATAGG<br>CAGCAGGACCATGTGATCGCGC | synthesis of dsRNA for <i>GFP</i>         |
